# Supplementary material for: miR-574-5p negatively regulates Qki6/7 to impact β-catenin/Wnt signalling and the development of colorectal cancer
Source: PubMed Central journal article supplement — Gut. 2012 Apr 5;62(5):716–26. doi: 10.1136/gutjnl-2011-301083 (PMC3618686; doi:10.1136/gutjnl-2011-301083), 2012-04-05
Supplement: gutjnl-2011-301083-s1.pdf [file gutjnl-2011-301083-s1.pdf]

## **SUPPLEMENTARY INFORMATION**

### **1. SUPPLEMENTAL DATA**

**Fig. S1** miR-574-5p MREs on human *Qki6/7/7b* mRNAs (related to Fig. 1). **A**, Human *Qki* gene structure, major transcripts, protein isoforms and 3'UTRs. Located at 6q26-q27, the human *Qki* gene contains eight exons. Due to alternative splicing, at least 4 major transcripts, namely *Qki5/6/7/7b*, can be produced. Each of these transcript isoforms has its own unique 3'UTR derived from the alternatively-spliced exons. However, a long stretch of overlapping sequences is found in the 3'UTRs for *Qki6/7/7b* respectively. Furthermore, a putative MRE for miR-574-5p was found in the 3'UTRs of *Qki6/7/7b* but not that of *Qki5* mRNA. Four major QKI proteins (QKI5/6/7/7b) can be produced from the four mRNA isoforms, which differ in their carboxyl termini encoded for by the alternatively spliced exons. A common N-terminal 311 amino acid peptide fragment encoded by the first six exons is shared by all four protein isoforms. This region contains a KH domain flanked by the QUA1 and the QUA2 motifs respectively. QUA1 is involved in protein homodimerization or heterodimerization while the KH and QUA2 domains might be responsible for RNA binding. The Y-motif is a tyrosine-rich region that serves as a site for tyrosine phosphorylation. In addition, there is a P-motif for the proline-rich region. The C-terminal of QKI5 (but not of the other three isoforms) contains a nuclear localization signal (NLS) that directs its entry into the nucleus. The figure was redrawn based on previous reports<sup>1-3</sup>. The putative MREs for miR-574-5p were indicated on the 3'UTRs for *Qki6/7/7b* respectively. **B**, Alignment of putative miR-574-5p seed-binding sites of mouse *Qki6/7-3'UTR* and human *Qki6/7/7b-3'UTR*. Mature human miR-574-5p (hsa-miR-574-5p) and mouse miR-574-5p (mmu-miR-574-5p) share 100% sequence similarity, with the sequence being 5'-ugagugugugugugagugugu-3'. **C**, MREs for miR-17, miR-20a and miR-200b on mouse *Qki5-3'UTR* as predicted by the miRanda algorithm ([www.microrna.org](http://www.microrna.org)). Data sets on [www.microrna.org](http://www.microrna.org) so far contain more complete 3'UTRs for specific genes and the miRanda algorithm distinguishes the 3'UTRs. **D** & **E**, MREs for miR-17, miR-20a, miR-200b, miR-466g, miR-574-5p and miR-717 on mouse *Qki6/7-3'UTRs* as predicted by the miRanda algorithm. Surprisingly, no MRE for miR-574-3p was predicted in the 3'UTRs for mouse or human *Qki5* or *Qki6/7/7b* mRNA.

**Fig. S2** Effects of miR-574-5p on *Qki* expression in human HCT116, SW480 and SW620 cells (related to Fig. 2). Human CRC cells were transfected with a miR-574 overexpressing plasmid, a miR-574-5p inhibitor. Cells were harvested for qPCR or western blot assays 24 hours after the transfections ( $n = 3-4$ ). Statistical comparisons were made between a control (pFlag-CMV or inhibitor control)-transfected cells and a particular treatment. NS, not significant; \*\*,  $p < 0.01$ ; \*\*\*,  $p < 0.001$ . **A**, Inhibition of miR-574-5p significantly increased the levels of *Qki5/6/7/7b* mRNA isoforms in SW480 and SW620 cells, but only *Qki6/7* were increased in HCT116 cells. **B**, Overexpression of miR-574-5p significantly reduced the level of total QKI protein in SW480 cells. **C**, Inhibition of miR-574-5p significantly increased the levels of total QKI and QKI5/6/7 proteins in SW480 cells.

**Fig. S3** Putative QREs on  $\beta$ -catenin mRNAs from a few mammals (related to Fig. 3). hsa, *Homo sapiens*; pab, *Pongo abelii*; mmu, *Mus, musculus*; bta, *Bos taurus*; ssc, *Sus scrofa*. Two putative QREs were indicated by QRE1 and QRE2 respectively. The distal QRE1 for  $\beta$ -catenin mRNAs from orangutans, mice, cows and pigs completely satisfies the bipartite consensus sequence of NACUAAAY-N<sub>1-20</sub>-UAAY (Galarneau and Richard, 2005; Hafner et al., 2010). With human  $\beta$ -catenin mRNAs, however, the number of the intervening nucleotides in the QRE1 between the core site NACUAAAY and the half site UAAY is 22 rather than smaller than or equal to 20. Similarly, the proximal QRE2 might also be functional<sup>4</sup>. However, this putative QRE is also slightly different from the consensus sequence, with the half-site being “CAAY” rather than “TAAY” and 22 intervening nucleotides between the putative core site and the putative half site.

**Fig. S4** Co-overexpression of *Qki5/6/7* significantly attenuated the oncogenic effects of miR-574-5p. CT26 cells were grown and transfected with pmiR-574 or pFlag-CMV in the presence or absence of pFlag-*Qki5/6/7* for 24 hours. Cells were subsequently harvested for mRNA or MTT analyses. For invasion analysis, similar transfection was performed with CT26 cells for 12 hours. Subsequently,  $5 \times 10^4$  transfected cells were seeded per upper chambers in serum-free RPMI 1640 medium whereas the lower chambers were loaded with RPMI 1640 medium containing 5% FBS. After 48 hours of incubation, cells were harvested for analysis. \*,  $p < 0.05$ ; \*\*,  $p < 0.01$ ; \*\*\*\*,  $p < 0.001$ . **A**, Re-introduction of *Qki5/6/7* significantly decreased  $\beta$ -catenin and increased *p27<sup>kip1</sup>* mRNA expression in miR-574-5p-overexpressing cells ( $n = 3-4$ ). **B** and **C**, Re-introduction of *Qki5/6/7* significantly reduced cell viability and cell invasion in miR-574-5p-overexpressing cells ( $n = 3-4$ ).

**Fig. S5** Expression levels of *Qki5/6/7/7b* mRNA and protein isoforms in the human CRC tissues and the adjacent normal epithelial tissues. T, tumor tissue; N, normal adjacent epithelial tissue. **A**, *Qki5* expression from ten pairs of clinical samples (#11-20) as determined by qPCR. **B**, *Qki6* expression from ten pairs of clinical samples (#11-20) as determined by qPCR. **C**, *Qki7* expression from ten pairs of clinical samples (#11-20) as determined by qPCR. **D**, *Qki7b* expression from ten pairs of clinical samples (#11-20) as determined by qPCR. **E**, QKI5/6/7/7b protein isoform expression in five pairs of clinical samples (#16-20) as determined by western blotting.  $n = 5$ , \*\*\*,  $p < 0.001$ .

**Fig. S6** Subcellular localization of QKI5/6/7 proteins in human SW620 or mouse CT26 cells and the relative expression of *Qki5/6/7/7b* mRNAs in CRC cells, clinical CRC tissue samples and normal adjacent epithelial tissue samples. **A**, Subcellular localization of QKI5/6/7 proteins in SW620 or CT26 cells as determined by western blotting. **B**, Subcellular localization of QKI5/6/7 proteins in CT26 cells as determined by immunofluorescence assays. Original magnification,  $\times 1,000$ . **C**, Relative expression of *Qki* mRNA isoforms in CT26, HCT116, SW480 and SW620 cells. Total RNA samples were isolated and qPCR was performed ( $n = 3-4$ ). All values were normalized with *Qki5* expression. **D**, Relative expression of *Qki* mRNA isoforms in clinical CRC and normal adjacent epithelial samples from 10 patients. Both the values for tumor tissues (T, black-colored) and corresponding adjacent noncancerous epithelial tissues from a particular patient (N, grey-colored) were normalized with the expression of *Qki5* mRNA in normal adjacent epithelial tissue from the same patient.

**Fig. S7** Effects of miR-574-5p overexpression on  $\beta$ -catenin subcellular localization as determined by western blots and immunofluorescent staining. For western blots, CT26 cells were transfected with a miR-574-5p overexpressing plasmid (pmiR-574) or its control (pFlag-CMV) for 24 hours and harvested for western blot analyses. For immunofluorescent staining, CT26 cells were seed on the coverslips and transfected with pmiR-574 or pFlag-CMV for 24 hours. Cells were then fixed for immunofluorescence analyses. **A**, Subcellular distribution of  $\beta$ -catenin protein as determined by western blots; **B**, Subcellular distribution of  $\beta$ -catenin protein as determined by immunofluorescent staining. Original magnification,  $\times 1000$ .

**Fig. S8** The miR-574-5p-QKI- $\beta$ -catenin/p27<sup>Kip1</sup> axis of signal transduction in the development of CRC. miR-574-5p derived from the first intron of either *Col3a1* or *Noxp20* regulates the expression of *Qki6/7/7b*

directly and negatively. *Qki5* may also be regulated by miR-574-5p indirectly. Down-regulation of QKIs will cause the overactivation of  $\beta$ -catenin and the suppression of p27<sup>Kip1</sup>. As a result, activities in colorectal epithelial cell proliferation, migration and invasion will be enhanced, whereas cell cycle arrest and differentiation will be suppressed. Additionally, miR-574-5p might also repress the expression of tumor suppressor ceramide synthase-1 isoform 2 (*CerS1-2*) posttranscriptionally.<sup>5</sup> QKIs, on the other hand, might also control the expression of macroH1A1.1 to impact tumorigenesis.<sup>6</sup> miR-574-5p thus appears to be oncogenic and may contribute to the dysregulation of colorectal epithelial cell differentiation and tumorigenesis or cancer progression through the suppression of tumor-suppressive QKIs. miR-574-5p expression might be co-regulated with its hosting-genes (either *Noxp20* or *Col3a1*), although this needs to be verified with further study. Additionally, Sox2 is a transcriptional factor implicated in the maintenance of the pluripotency of stem cells<sup>7-9</sup>, neurogenesis<sup>10-13</sup> and development of cancers.<sup>14-17</sup> In glioblastoma multiforme cells, the knockdown of *Sox2* caused significant down-regulation of miR-574-5p.<sup>18</sup> Coincidentally or not, aberrant Sox2 up-regulation and miR-574-5p up-regulation are often co-detected in diseases such as CRC (<sup>15</sup> and current study), glioblastoma,<sup>18</sup> lung cancer,<sup>19-21</sup> esophageal squamous carcinoma<sup>16,22</sup> etc. Together these observations suggest that Sox2 might regulate miR-574-5p positively. The possible regulation of *Noxp20*, *Col3a1* and miR-574-5p and *Qkis* by *Apc*, however, is not clear and warrant further research. *Apc*, adenomatous polyposis coli; *Col3a1*, procollagen Type III, alpha-1; *Noxp20*, nervous system overexpressed protein-20; *Sox2*, SRY-like HMG box-2.

**Fig. S9** Schematic graphs for twelve plasmids used in the current study. See the Materials and Methods section for more details. hGH-pA, poly-A for human growth hormone gene; Luc, luciferase; SV40-pA, SV40 poly-A.

**Table S1** The expression of miR-574-5p and pan-*Qki* mRNA and protein and the clinicopathological features of 60 CRC patients.

**Table S2** Alterations of miR-574-5p expression in diseases.

Fig. S1

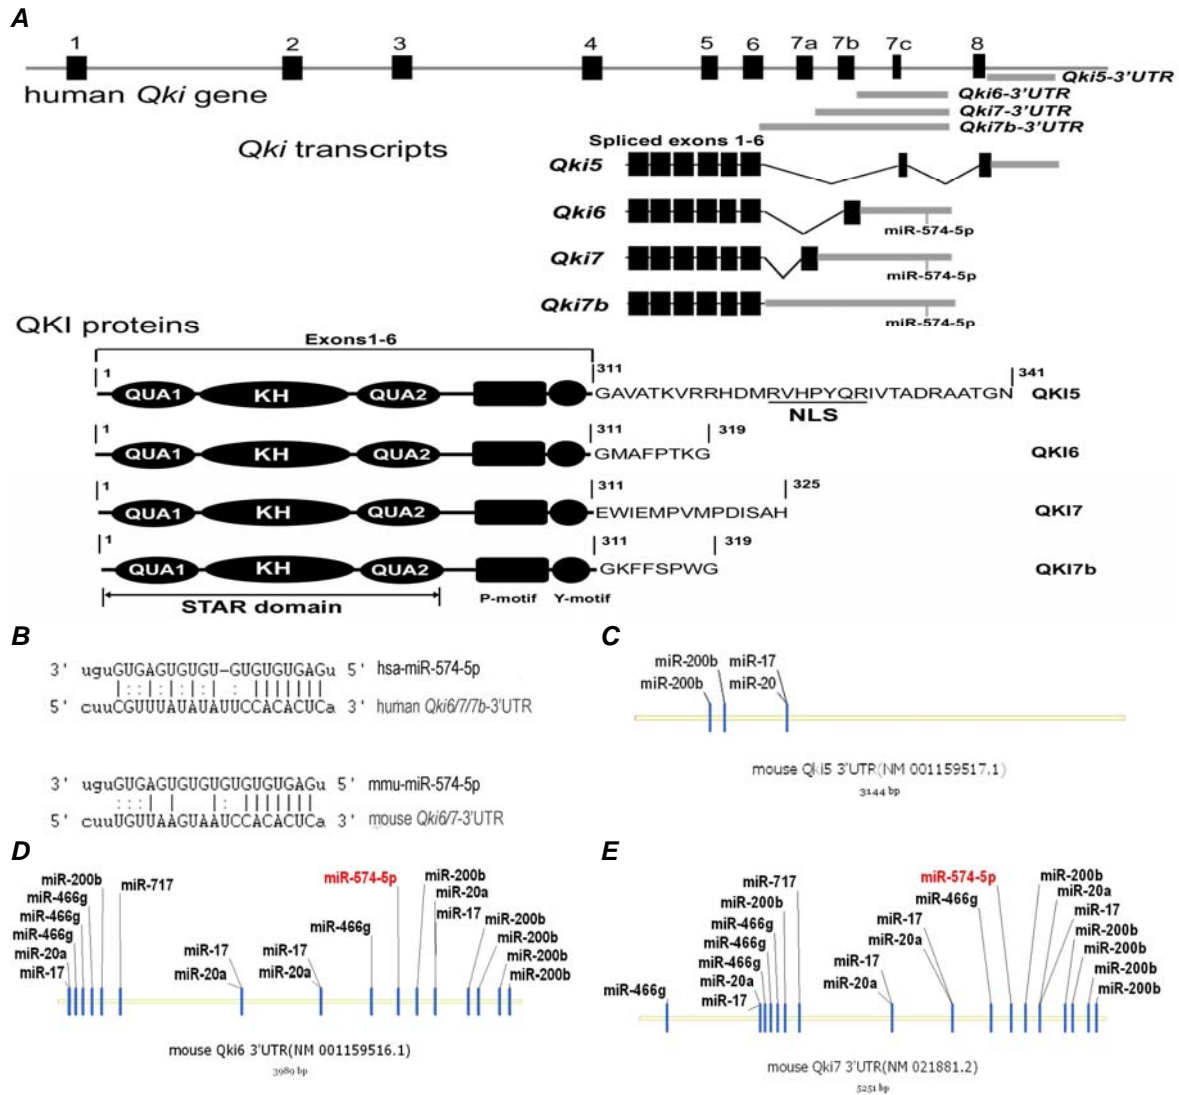

Fig. S2

A

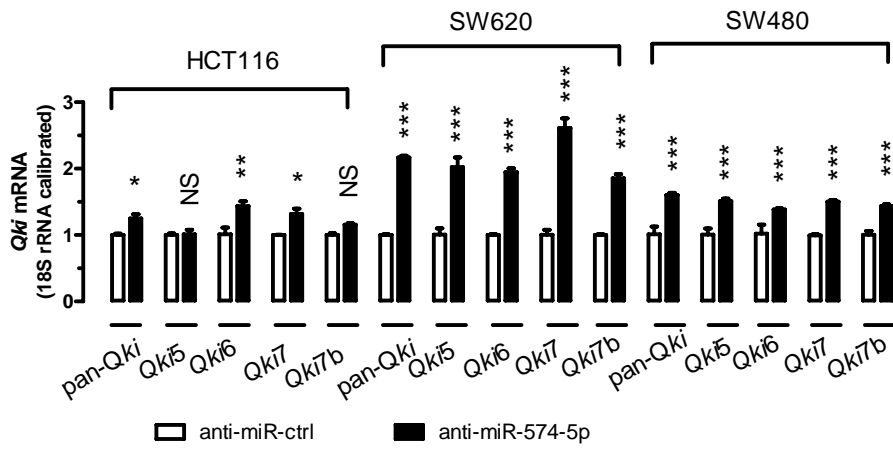

B

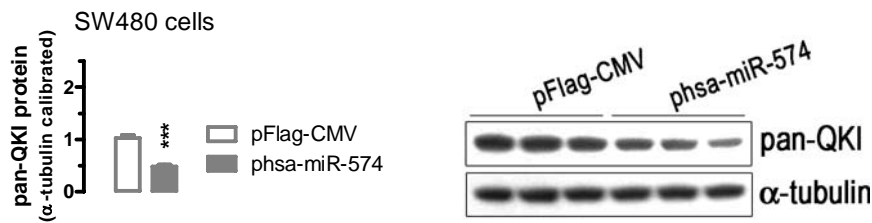

C

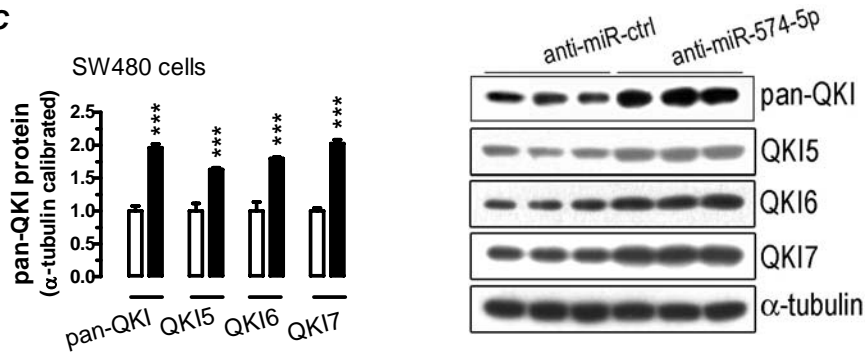

Fig. S3

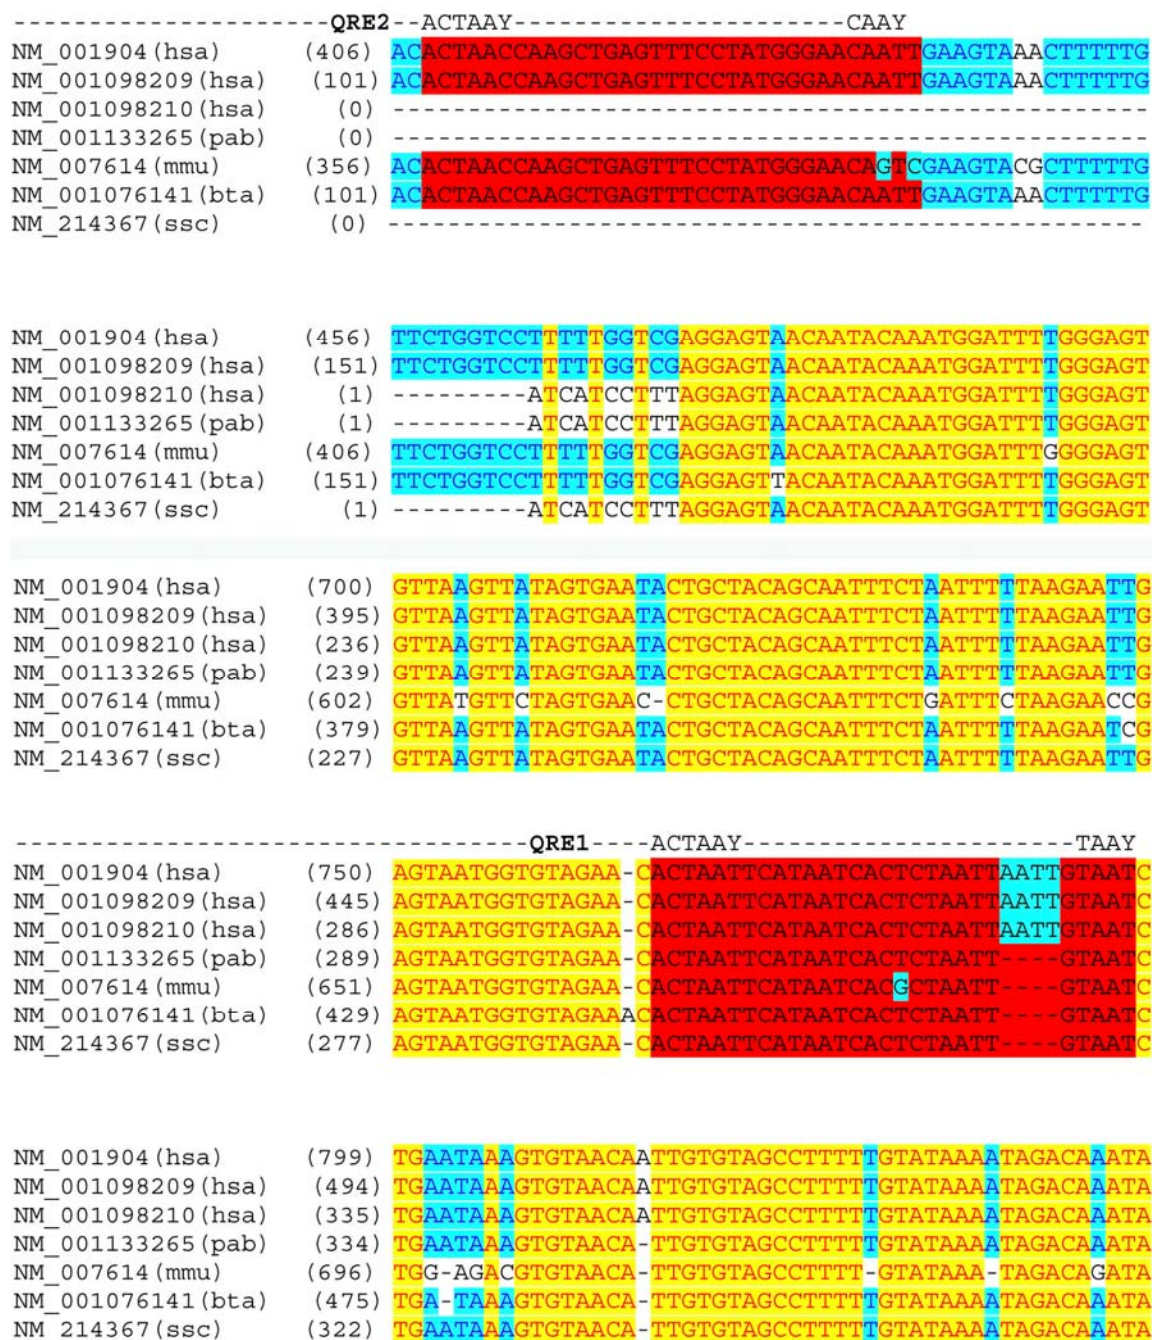

Fig. S4

**A**

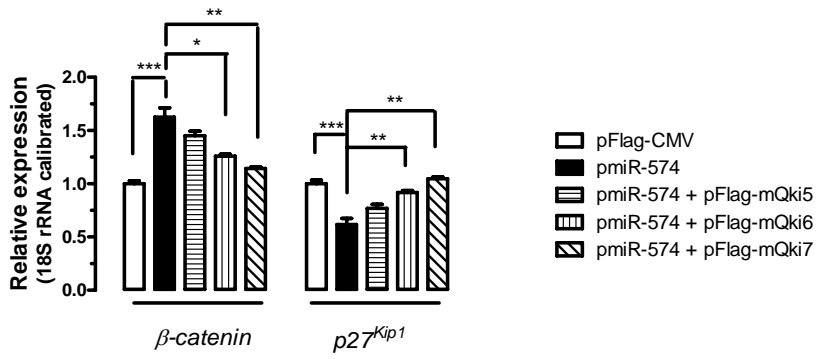

**B**

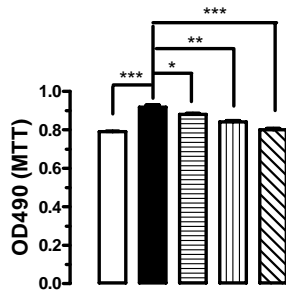

**C**

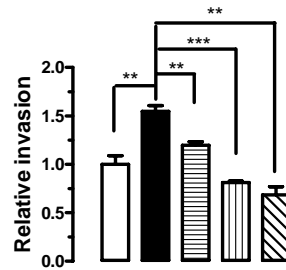



Fig. S5

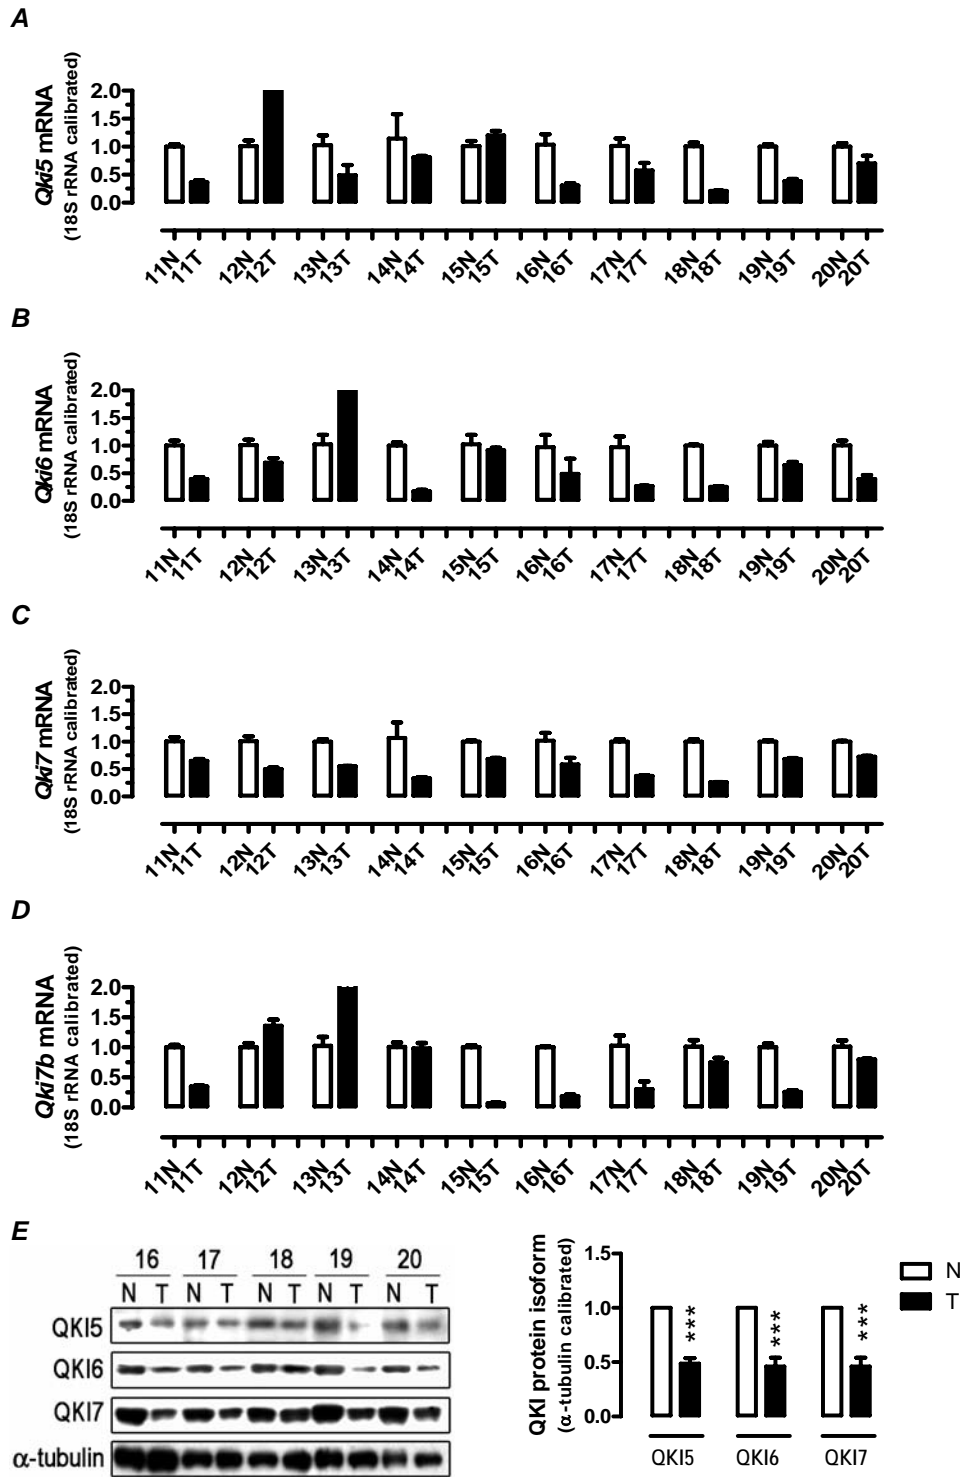

Fig. S6

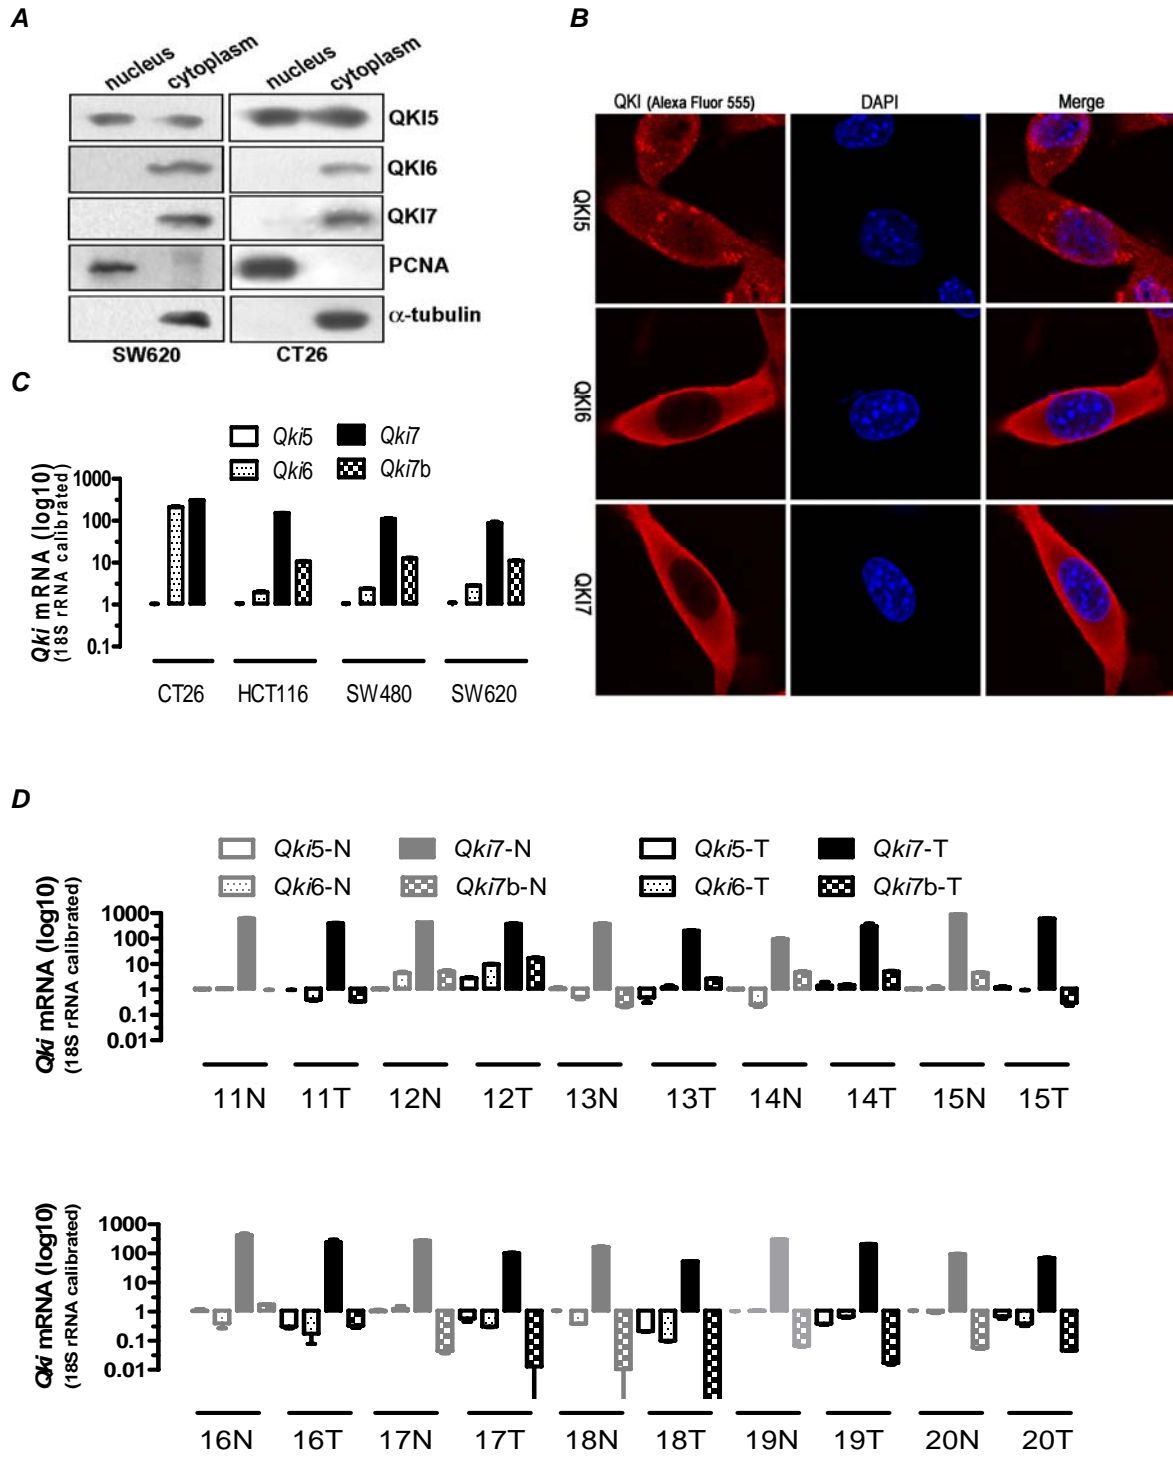

**Fig. S7**

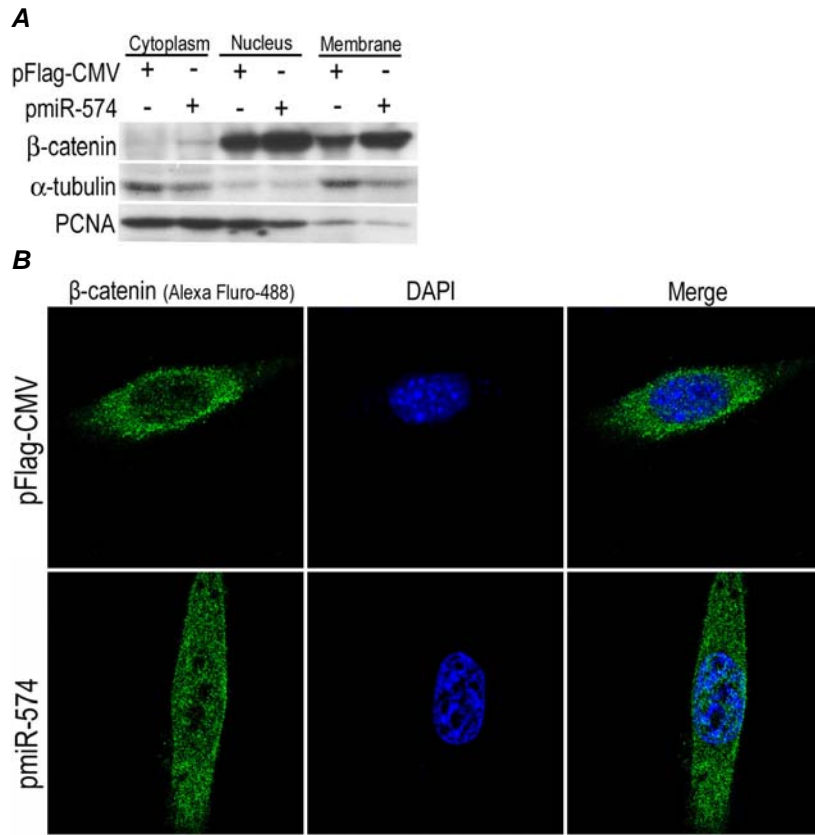

Fig. S8

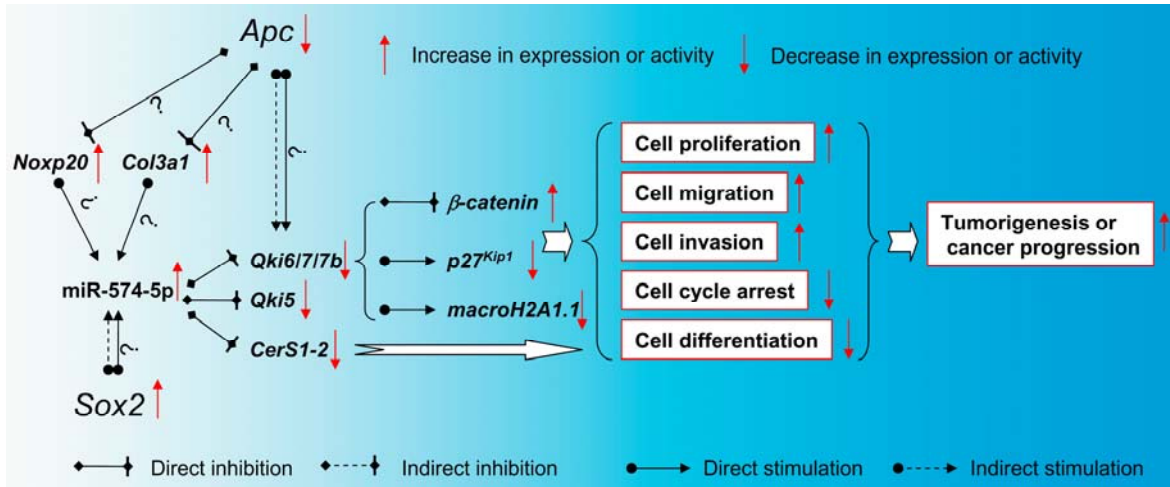

Fig. S9

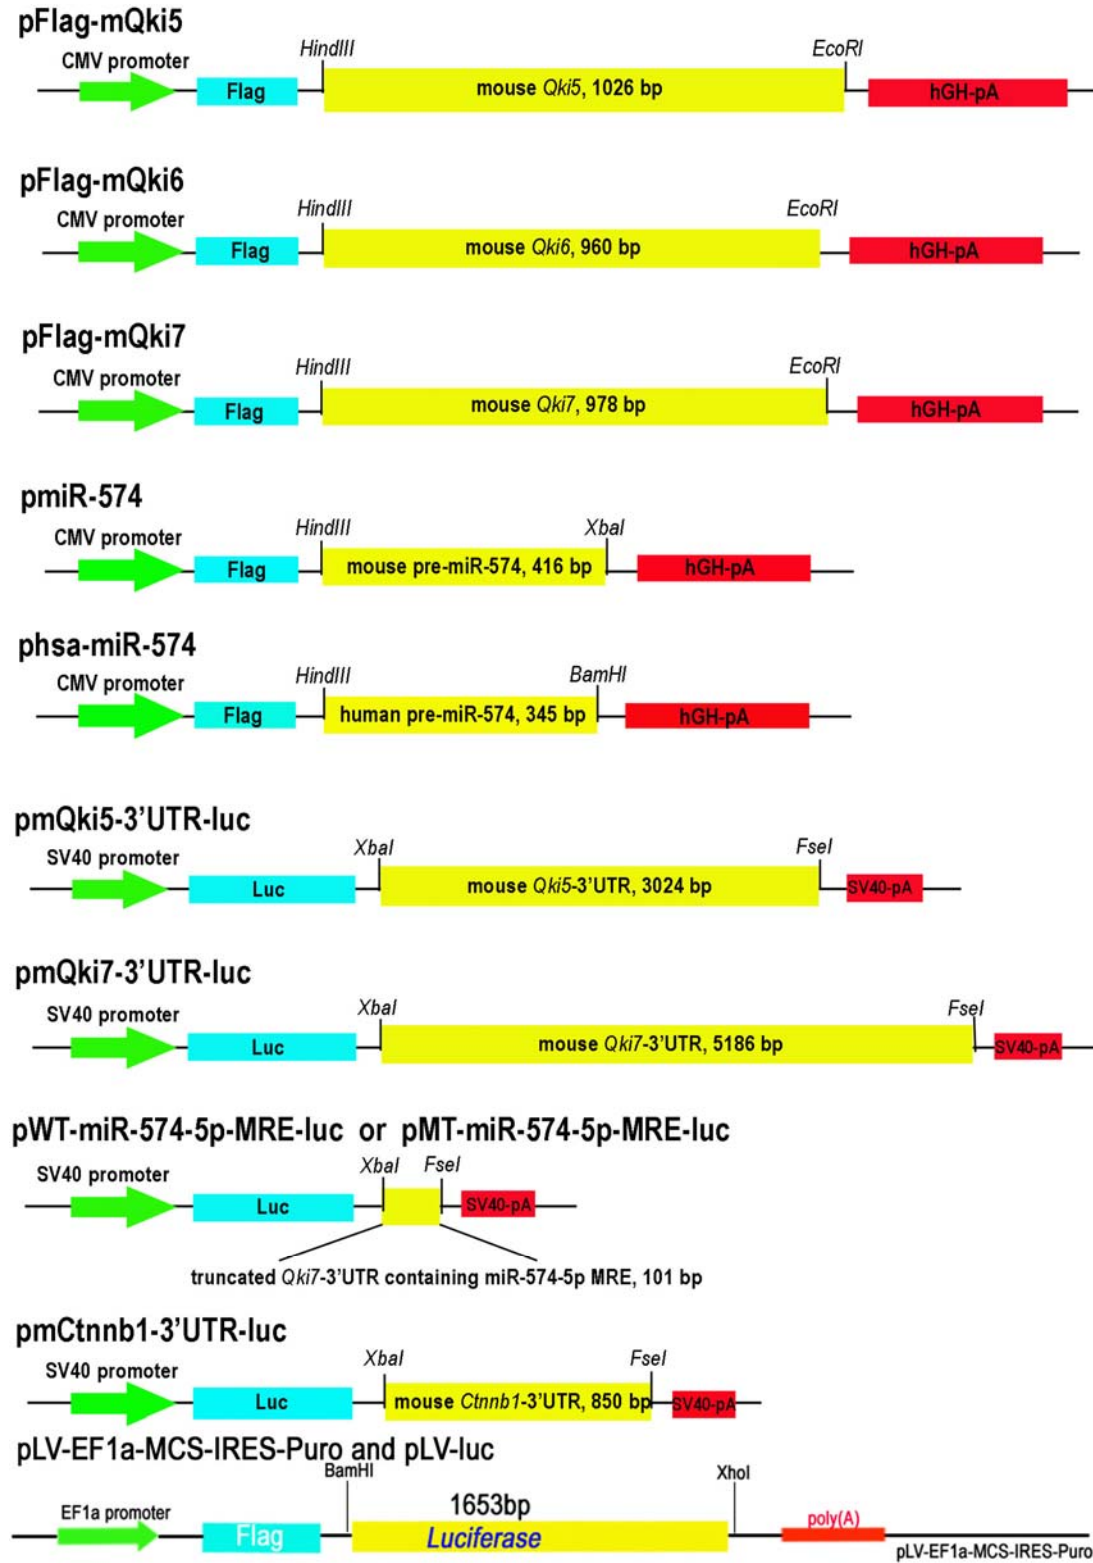

Table S1

|                         |     | <i>n</i> | %    | miR-574-5p<br>(Normalized) | Pan- <i>Qki</i> mRNA<br>(Normalized) | Pan-QKI protein<br>(Normalized) |
|-------------------------|-----|----------|------|----------------------------|--------------------------------------|---------------------------------|
| Gender                  | M   | 40       | 67.7 | 3.136 ± 0.5718             | 0.8483 ± 0.1774                      | 0.7554 ± 0.0977                 |
|                         | F   | 20       | 33.3 | 2.793 ± 0.532              | 0.7278 ± 0.1335                      | 0.7882 ± 0.0929                 |
| Age                     | ≤60 | 28       | 46.7 | 3.238 ± 0.8269             | 0.9206 ± 0.2304                      | 0.7509 ± 0.094                  |
|                         | >60 | 32       | 53.3 | 2.843 ± 0.3409             | 0.7134 ± 0.1315                      | 0.7789 ± 0.1097                 |
| TNM<br>stage            | I   | 8        | 13.3 | 5.737 ± 2.546              | 0.9503 ± 0.4494                      | 0.8613 ± 0.3316                 |
|                         | II  | 15       | 25   | 2.666 ± 0.5652             | 1.115 ± 0.412                        | 0.8046 ± 0.1773                 |
|                         | III | 36       | 60   | 2.593 ± 0.3291             | 0.6608 ± 0.082                       | 0.7292 ± 0.0674                 |
|                         | IV  | 1        | 1.7  | 2.415                      | 0.4825                               | 0.74                            |
| Lymph<br>node<br>status | N0  | 23       | 38.4 | 3.734 ± 0.9734             | 1.058 ± 0.3051                       | 0.8243 ± 0.1589                 |
|                         | N1  | 17       | 28.3 | 2.549 ± 0.5684             | 0.7131 ± 0.1462                      | 0.7564 ± 0.0935                 |
|                         | N2  | 20       | 33.3 | 2.621 ± 0.3574             | 0.6075 ± 0.0828                      | 0.7066 ± 0.0935                 |
|                         | N3  | 0        |      |                            |                                      |                                 |

**Table S2**

| <b>Organism</b> | <b>Condition</b>                     | <b>miR-574-5p expression</b> | <b>Affected cells or tissues</b> | <b>Fold change</b> | <b>References</b> |
|-----------------|--------------------------------------|------------------------------|----------------------------------|--------------------|-------------------|
| Human           | CRC                                  | Up                           | Colorectal cells                 | Very significant   | Current study     |
| Human           | Pituitary adenomas                   | Up                           | Pituitary tissue                 | 2.89               | <sup>23</sup>     |
| Human           | Systemic lupus erythematosus         | Up                           | T lymphocyte                     | > 2                | <sup>24</sup>     |
| Human           | Pancreatic cancer                    | Up                           | Pancreatic tissue                | 51                 | <sup>25</sup>     |
| Human           | Lymphoma                             | Altered                      | Lymphocyte                       | ?                  | <sup>26</sup>     |
| Human           | Myocardial infarction                | Up                           | Heart                            | Very significant   | <sup>27</sup>     |
| Human           | Non-small cell lung cancer           | Up                           | Lung                             | 2.17               | <sup>20</sup>     |
| Human           | Small cell lung cancer               | Altered                      | Lung                             | ?                  | <sup>21</sup>     |
| Human           | Eosophageal squamous cell carcinoma  | Up                           | Eosophageal squamous cells       | 1.72               | <sup>22</sup>     |
| Human           | Alzheimer's                          | Up                           | Gray matter                      | ?                  | <sup>28</sup>     |
| Human           | Schizophrenia                        | Altered                      | Brain tissue                     | ?                  | <sup>29</sup>     |
| Human           | Mitral stenosis                      | Up                           | Right atrial appendage           | 1.96               | <sup>30</sup>     |
| Human           | Ovarian cancer                       | Up                           | Ovary tissue                     | 1.24               | <sup>31</sup>     |
| Mouse           | CRC                                  | Up                           | Colorectal cells                 | 3.7                | Current study     |
| Mouse           | Vesicular stomatitis virus infection | Up                           | Macrophage                       | ?                  | <sup>32</sup>     |
| Mouse           | Asthma                               | Up                           | Lung cells                       | 13                 | <sup>33</sup>     |
| Mouse           | SARS infection                       | Altered                      | Bronchoalveolar stem cells       | ?                  | <sup>34</sup>     |
| Mouse           | Liver injury                         | Up                           | Liver/plasma                     | 3.4/1.49           | <sup>35</sup>     |

## 2. SUPPLEMENTAL MATERIALS AND METHODS

**Plasmids.** TOP/FOP-Flash plasmids and the Wnt1-overexpressing (Wnt1) plasmid were kind gifts from Prof. Qiao Wu, Xiamen University.

For *Qki* overexpression plasmids, primers were designed based on the genomic sequences from the NCBI databases, with the forward primer carrying a *HindIII* site and the reverse primer carrying an *EcoRI* respectively. Mouse *Qki5*, *Qki6*, *Qki7* were individually PCR-amplified using mouse brain tissue cDNA and appropriate primers (see List of primers used for miRNA or *Qki* overexpression plasmids), with the LA Taq DNA Polymerase (TaKaRa, Dalian). The resultant DNA fragments were subcloned into pFlag-CMV (Sigma Aldrich, St. Louis, MO, USA) using the *HindIII* and *EcoRI* sites.

For mouse miRNA overexpressing plasmids, primers were designed based on the genomic sequences from the miRBase (microna.sanger.ac.uk), with the forward primers carrying a *HindIII* site and the reverse primers carrying a *XbaI* site respectively. Pre-miRNA gene fragments were individually PCR-amplified using genomic DNA prepared from mouse inner medullary collecting duct epithelial mIMCD3 cells (mmu-miR-574) or human CRC SW480 cells (hsa-miR-574) and appropriate primers (see List of primers used for miRNA or *Qki* overexpression plasmids), with Pyrobest DNA Polymerase (TaKaRa). The resultant DNA fragments were subcloned into pFlag-CMV, using the *HindIII* and *XbaI* (mmu-miR-574) or *HindIII* and *BamHI* (hsa-miR-574) sites. The insertion sequences of the resultant plasmids were confirmed by sequencing.

For the construction of mouse *Qki5*-3'UTR, wildtype *Qki7*-3'UTR miR-574-5p MRE, mutant *Qki7*-3'UTR miR-574-5p MRE and *Ctnnb1* luciferase reporters, mouse 3'UTR regions were amplified from mouse brain tissue cDNA through PCR amplification with the LA Taq DNA Polymerase (TaKaRa) and appropriate primers (see List of primers used for the construction of five luciferase reporters). The resultant PCR fragments carrying a *NheI* site and a *FseI* site was subcloned into the pGL3-control vector (Promega), using the *XbaI* and *FseI* sites immediately downstream of the stop codon of the luciferase cDNA, generating pmQki5-3'UTR-luc, pmQki7-3'UTR-luc, pWT-miR574-5p-MRE-luc, pMT-miR574-5p-MRE-luc and pmCtnnb1-3'UTR-luc respectively.

For the construction of lentiviral plasmid carrying a luciferase gene, the luciferase reporter gene on plasmid pGL3 (Promega, USA) was PCR amplified and a *BamHI-XhoI* insert gene cassette was inserted



into a lentiviral vector pLV-EF1a-MCS-IRES-Puro ( A gift from Prof. Jiahuai Han) to obtain a plasmid pLV-luc.

The resulting twelve plasmids are shown in Fig. S9 in the previous section.

**Cell culture and transient transfections.** Mouse CT26, human SW480 and SW620 CRC cells were obtained from ATCC (Manassas, VA, USA), human HCT116 CRC cells was obtained from the Chinese Academy of Sciences (Shanghai, China). CT26 cells and HCT116 cells were normally cultured in RPMI 1640 with 10% fetal bovine serum (FBS). SW480 and SW620 cells were cultured in DMEM supplemented with 10% FBS. Plasmids, miRNA mimics and inhibitor transfections were performed with Lipofectamine 2000 reagent (Invitrogen, Carlsbad, CA, USA) according to the manufacturer's protocols.

**Western blot, immunohistochemistry, immunofluorescence and in situ hybridization analyses.**

Western blots were performed according to standard protocols. The detection was achieved using the Immobilon Western Chemiluminescent HRP Substrate kit (Millipore, Billerica, MA, USA). Antibodies and the dilutions are anti- $\alpha$ -tubulin (sc-5286, Santa Cruz, 1:10000); anti- $\beta$ -actin (sc-47778, Santa Cruz, 1:20000); anti-pan-QKI (sc-103851, Santa Cruz, 1:2000); anti-QKI5 (AB9904, Millipore, 1:2000); anti-QKI6 (AB9906, , Millipore, 1:2000); anti-QKI7 (AB9908, Millipore, 1:2000); anti-p27<sup>Kip1</sup> (sc-528, Santa Cruz, 1:2000); anti- $\beta$ -catenin (sc-7199, Santa Cruz, 1:2000); anti-PCNA (sc-7907, Santa Cruz, 1:2000); Alexa Fluor 555-labeled goat Anti-Rabbit IgG (H+L) (A0452, Beyotime Institute of Biotechnology, 1:500) respectively.

Immunohistochemistry was performed with an instant-type SABC immunohistochemistry kit purchased from the Boster Bioengineering Company (Wuhan, China) as instructed. Briefly, 5  $\mu$ m fixed tissue sections were microwave-heated for 10 min for antigen retrieval. Slides were washed and incubated with primary antibody for 1 hour followed by incubation with instant-type secondary antibody for 30 minutes at room temperature. After being thoroughly washed with PBS (pH 7.5), the tissues were incubated with SABC (Strept-Avidin-Biotin Complex) for 20 minutes at room temperature. After washing thoroughly, 100-200  $\mu$ l freshly-made diaminobenzidine (DAB) solution was added to each slide. After incubation for ~10 minutes, sections were lightly counter-stained with hematoxylin.

For immunofluorescence analyses, cells seeded on cover glass overnight were fixed in 4% paraformaldehyde. Fixed cells were incubated with anti-QKI5, QKI6 or QKI7 primary antibody

respectively, followed by incubation with Alexa Fluor® 555-conjugated secondary antibody or Alexa Fluor® 488-conjugated secondary antibody (Beyotime Institute of Biotechnology, Jiangsu, China). Cell nuclei were stained by DAPI (Beyotime Institute of Biotechnology). Stained cells were visualized and photographed with a Leica-TCS-SP2-SE confocal microscope.

*In situ* hybridization of miRNAs was performed as described<sup>36</sup>. miRCURY™ LNA miRNA probes (hsa-miR-574-5p, 5'-ACACACTCA-CACACACACTCA-3'; hsa-miR-200b, 5'-TCATCATTACCAGGCAGTATTA-3'; U6, 5'-CACGAATTTGCGTGTCATCCTT-3'; Scramble-miR, 5'-GTGTAACACGTCTATACGCCCA-3') were purchased from Exiqon (Copenhagen, Denmark).

**qPCR analyses of mRNAs and miRNAs.** For qPCR mRNA quantification, reverse transcription was performed with TRIzol (Invitrogen)-extracted total RNAs using a ReverTra Ace-α-® Kit as instructed (TOYOBO, Shanghai). qPCR was performed by using the SYBR Green qPCR Master Mix (TOYOBO) and the StepOne Plus qPCR system (Applied Biosystems Inc., Foster City, CA) according to the manufacturer's protocols and with the primer pairs listed below.

For miRNAs, qPCR was performed with the stem-loop primers as described previously<sup>37</sup> using the miRNA-specific reverse transcription primers, the universal primer and the miRNA-specific reverse locked nucleic acid (LNA)-primers as described below.

**Cell cycle, proliferation, migration, invasion and colony formation assays.** For cell cycle analysis,  $5 \times 10^5$  cells were synchronized by serum starvation for 24 hours and induced to re-enter the cell cycle by replacing old media with a fresh media containing 10% fetal bovine serum (FBS) for 24 hours. Cells were harvested and fixed in 75% ethanol at 4 °C overnight. Cells were incubated with RNase A at 37 °C for 30 min, and then stained with propidium iodide. The cell cycle phases were measured by flow cytometry.

Cell proliferation was analyzed by the MTT assay. A total of  $4 \times 10^3$  cells was seeded in 96-well plates and MTT was added to each well every 24 hours. The plates were incubated for 4 hours before the addition of 10% SDS (in 0.01M HCl) (Sigma Aldrich, St. Louis, MO, USA). The absorbance was measured at 490 nm using a microplate reader.

Cell migration was analyzed by the wound-healing assays. SW480 cells were seeded onto 6-well plates. After transfection, a wound was incised in the center of the confluent culture, followed by careful washing to remove detached cells and the addition of fresh medium. Phase contrast images of the wounded

area were recorded using an inverted microscope at indicated time points.

Matrigel invasion assays were performed using Millicell inserts coated with matrigel (BD Biosciences, Sparks, MD, USA).  $5 \times 10^4$  CT26 cells were seeded per upper chambers in serum-free RPMI1640 whereas the lower chambers were loaded with RPMI1640 containing 5% FBS. After 48 hours, the non-migrating cells on the upper chambers were removed by a cotton swab, and cells invaded through the matrigel layer to the underside of the membrane were stained with a 0.1% crystal violet solution and counted manually in eight random microscopic fields.

For colony formation assays, control and miRNA inhibitor or LV-miR-shRNA (Supplemental Materials and Methods section, Supplementary Information) transfected SW480 cells were seeded on six-well plates and maintained in DMEM containing 10% FBS for 2 weeks. Cells were fixed with methanol and stained with 0.5% crystal violet in 50% methanol for 1 hour and colonies larger than 100  $\mu\text{m}$  in diameter were counted.

**Luciferase reporter assays and IAP enzyme activity assays.** Luciferase reporter activities were determined using a Luciferase Reporter Gene Assay System (Promega, Madison, WI, USA) as instructed. For all luciferase assays,  $\beta$ -galactosidase activities were determined to calibrate the transfection efficiency. The calibrated value for a proper control was used to normalize all other values to obtain the normalized relative luciferase units (RLU) representing the activities of 3'UTRs.

The enzyme activity of IAP was measured by an IAP kit (Jiancheng, Nanjing, China) according to the manufacturer's instructions. Protein concentration was measured by the Pierce BCA kit (Pierce Biotechnology, Rockford, USA).

**Bioluminescence imaging of tumor growth in live animals.** Briefly, CT26 cells were transfected with a luciferase-overexpressing plasmid or its control vector (pLV-luc or pLV-EF1a-MCS-IRES-Puro). Stable clones of cells overexpressing luciferase were selected with the addition of 8-10  $\mu\text{g}/\text{ml}$  puromycin in the media for 3 weeks (Invitrogen, Carlsbad, CA, USA). Luciferase-overexpressing cells or its controls were subsequently injected into the nude mice intraperitoneally ( $5 \times 10^5$  cells/mouse). Starting from the third day after CT26 cell inoculation, each mouse was injected with  $2 \times 10^7$  transducing units of control lentiviruses or lentiviruses carrying shRNA for miR-574-5p once a week for 2 weeks. Three days after lentiviral injection, the mice were subjected to bioluminescence imaging under an IVIS Lunina II *in vivo* imaging system

(Xenogen, Hopkinton, MA, USA) as described by Lan et al.<sup>38</sup> every other three days. Ten minutes prior to imaging, each mouse was injected with 100  $\mu$ l D-luciferin solution (15 mg/ml in PBS, Promega #E1602) by i.p. injection. Immediately before imaging taking, the experimental mice were anesthetized using an XGI-8 Gas Anesthesia System (Xenogen). Images and amount of bioluminescent signals were analyzed using Living Image software (Xenogen).

***Serum miRNA preparations and analyses.*** Total RNA from serum was extracted using a miRVana miRNA isolation kit (Ambion, Austin, TX, USA) according to the manufacturer's protocol. RNA was eluted in nuclease free water at 95°C. Five microliters of total RNA was reverse transcribed using the ReverTra Ace- $\alpha$ -<sup>®</sup> Kit as instructed (TOYOBO, Shanghai) and miRNA-specific stem-loop primers as shown in the Materials and Methods section. has-miR-16-5p served as an internal control. Visible and dissectable peritoneal tumors were dissected and weighted.

***Bioinformatics, data acquisition, image processing and statistical analyses.*** Mature and pre-miRNA sequences were based on miRBase (microrna.sanger.ac.uk). miRNA target predictions were performed with the miRanda ([www.microrna.org](http://www.microrna.org)) algorithm. Western blot images were captured by Biosense SC8108 Gel Documentation System with GeneScope V1.73 software (Shanghai BioTech, Shanghai, China). Gel images were imported into Photoshop for orientation and cropping. The digital density values were acquired by Image-Pro Plus software (Media Cybernetics) and analyzed by Graphpad Prism 5.0. Data are the means  $\pm$  SEM. One-way ANOVA with Bonferonni's post-test was used for multiple comparisons and the Student's *t*-test (two-tailed) for pair-wise comparisons. The correlation analyses were performed with Pearson's test.

*List of primers used for the construction of miRNA or Qki overexpression plasmids*

| Plasmid                 | Primer sequence (from 5'→3')                                                                       | Gene ID                   | Amplicon (bp) |
|-------------------------|----------------------------------------------------------------------------------------------------|---------------------------|---------------|
| pFlag-mQki5<br>(mouse)  | Forward:CCCAAGCTTATGGTCGGGGAAAT<br>GGAAAC<br>Reverse:CCGGAATTCCTAGTTGCCGGTGGC<br>GGCTC             | NM_001159517<br>(Genbank) | 1026          |
| pFlag-mQki6<br>(mouse)  | Forward:CCCAAGCTTATGGTCGGGGAAAT<br>GGAAAC<br>Reverse:CCGGAATTCCTAGCCTTTCGTTGG<br>GAAAG             | NM_001159516<br>(Genbank) | 960           |
| pFlag-mQki7<br>(mouse)  | Forward:CCCAAGCTTATGGTCGGGGAAAT<br>GGAAAC<br>Reverse:CCGGAATTCCTCAATGGGCTGAAAT<br>ATCAG            | NM_021881<br>(Genbank)    | 978           |
| pmiR-574<br>(mouse)     | Forward:<br>CCCAAGCTTTGTCCGCTGTAGGGTGTGAG<br>AA<br>Reverse:<br>TGCTCTAGAATCAGGATGGAGGTCAAGGC<br>CT | MI0005518 (miRBase)       | 416           |
| phsa-miR-574<br>(human) | Forward:<br>CCCAAGCTTCCTCTGCGTTAGTGAGAAGC<br>AG<br>Reverse:<br>GCGGATCCTCTGTCTTACAGGGACCTGC<br>TC  | MI0003581 (miRBase)       | 345           |

*List of primers used for the construction of six luciferase reporters.*

| Plasmid               | Primer sequence (from 5'→3')                                                                        | Gene ID                             | Amplicon length and location |
|-----------------------|-----------------------------------------------------------------------------------------------------|-------------------------------------|------------------------------|
| pmQki5-3'UTR-luc      | Forward:<br>TGCGCTAGCTATGACCTTCTGACCTCTGAACTCT<br>Reverse:<br>ACTGGCCGGCCTATGGGTTAATAGAAACAGCAAAGA  | <i>mQki5</i><br>NM_001159517        | (NTs 1517-4540) 3024 bp      |
| pmQki7-3'UTR-luc      | Forward:<br>TGCGCTAGCCTTGCTGGATGAAGGACTAGA<br>Reverse:<br>ACTGGCCGGCCTTGGCCTCATGATACAAAGCAATAC      | <i>mQki7</i><br>NM_021881           | (NTs 1467-6652) 5186 bp      |
| pWT-miR574-5p-MRE-luc | Forward:<br>TGCTCTAGACTTTGTTAAGTAATCCACACTC<br>Reverse:<br>ACTGGCCGGCCAACGGTTGTCCCATAGTCTTAA        | <i>mQki7</i><br>NM_021881           | (NTs 5650-5750) 101bp        |
| pMT-miR574-5p-MRE-luc | Forward:<br>TGCTCTAGACTTTGTTAAGTAATCCGCACGC<br>Reverse:<br>ACTGGCCGGCCAACGGTTGTCCCATAGTCTTAA        | <i>mQki7</i><br>NM_021881           | (NTs 5650-5750) 101 bp       |
| pmCnnb1-3'UTR-luc     | Forward:<br>TGATCTAGAAAGACTTGGTAGGGTGGGAATGG<br>Reverse:<br>ACTGGCCGGCCGCAGGTTACAACAACCTTTGGGAT     | Mouse $\beta$ -catenin<br>NM_001904 | (NTs 2707-3557) 850 bp       |
| pLV-luc               | Forward:<br>AGAGAATTCGGATCCATGGAAGACGCCAAAAACATAA<br>Reverse:<br>CCATGGCTCGAGCCCTTACACGGCGATCTTTCCG | pGL3 (Promega)                      | 1365 bp                      |

*List of miR-mimics, anti-miRs, lentiviral miR-shRNAs and LNA-probes for miRNA in situ hybridization.*

| Name                    | Sequence or target (5'→3')                       | Catalog # | Supplier                |
|-------------------------|--------------------------------------------------|-----------|-------------------------|
| mimics-ctrl             | Scrambled                                        |           | GenePharma,<br>Shanghai |
| miR-574-5p<br>mimics    | UGAGUGUGUGUGUGUGAGUGUGU<br>ACACUCACACACACACUCAUU |           | GenePharma,<br>Shanghai |
| anti-miR-ctrl           | Scrambled                                        |           | GenePharma,<br>Shanghai |
| anti-miR-574-5p         | UGAGUGUGUGUGUGUGAGUGUGU                          | AM17000   | Ambion                  |
| LV-miR-shRNA-<br>ctrl   | TTCTCCGAACGTGTCACGT                              | pLVT4     | Sunbio, Shanghai        |
| LV-miR-574-5p-<br>shRNA | ACACACTCACACACACACTCA                            | pLVT278   | Sunbio, Shanghai        |
| Scrambled miRNA         | GTGTAACACGTCTATACGCCCA/3Dig                      | 99004-05  | Exiqon,<br>Copenhagen   |
| U6 probe                | CACGAATTTGCGTGTCATCCTT/3Dig                      | 99002-05  | Exiqon,<br>Copenhagen   |
| hsa-miR-574-5p<br>probe | ACACACTCACACACACACTCA//3Dig                      | 38674-05  | Exiqon,<br>Copenhagen   |

*List of primers used for qPCR analyses of mRNAs.*

| Organism                       | Gene             | Gene ID                                                          | Primer sequence (5'→3')                                                         | Amplicon (bp) |
|--------------------------------|------------------|------------------------------------------------------------------|---------------------------------------------------------------------------------|---------------|
| Human                          | pan- <i>Qki</i>  | NM_006775                                                        |                                                                                 |               |
|                                |                  | NM_206853                                                        | Forward:CATCAGCTGCATCTTCTTCAG                                                   | 121           |
|                                |                  | NM_206854                                                        | Reverse:CACTGTGGAAGATGCTCAGAA                                                   |               |
|                                |                  | NM_206855                                                        |                                                                                 |               |
|                                | <i>Qki5</i>      | NM_006775                                                        | Forward:GCCCTACCATAATGCCTTTGA<br>Reverse:AACTTTAGTAGCCACCGCAACC                 |               |
|                                | <i>Qki6</i>      | NM_206853                                                        | Forward:GCCCCAAGCTGGTTTAATCTATA<br>Reverse:TCGTTGGGAAAGCCATACCTAAT              | 118           |
|                                | <i>Qki7</i>      | NM_206854                                                        | Forward:GCTGGTTTAATCTATACACCCTATG<br>A                                          | 113           |
|                                |                  |                                                                  | Reverse:GACTGGCATTCAATCCACTCTA                                                  |               |
|                                | <i>Qki7b</i>     | NM_206855                                                        | Forward:AATGCCTTTGATCAGACAAATACA<br>G<br>Reverse:TGGGGAGAAGAAGCTTACCTAATAC<br>A | 198           |
|                                | <i>β-catenin</i> | NM_001904                                                        | Forward:AGCCACAAGATTACAAGAAACGG<br>Reverse:ATCCACCAGAGTGAAAAGAACGA              | 173           |
| <i>p27<sup>Kip1</sup></i>      | NM_004064        | Forward:GGGGCTCCGGCTAACTCTGA<br>Reverse:AGGCTTCTTGGGCGTCTGCT     | 215                                                                             |               |
| 18S rRNA                       | NR_003286.2      | Forward:CGACGACCCATTCGAACGTCT<br>Reverse:CTCTCCGGAATCGAACCTGA    | 102                                                                             |               |
| Mouse                          | pan- <i>Qki</i>  | NM_001159517                                                     | Forward:TAGAGGACTTACAGCTAAACAACCT                                               | 288           |
|                                |                  | NM_001159516                                                     | Reverse:ATTCAGAATTGCAAGCTCCATCA                                                 |               |
|                                |                  | NM_021881                                                        |                                                                                 |               |
|                                | <i>Qki5</i>      | NM_001159517                                                     | Forward:GCCCTACCATAATGCCTTTGA<br>Reverse:AACTTTAGTAGCCACCGCAACC                 | 211           |
|                                | <i>Qki6</i>      | NM_001159516                                                     | Forward:GCCTGAAGCTGGGTTAATCTACA<br>Reverse:TCGTTGGGAAAGCCATACCTAAC              | 118           |
|                                | <i>Qki7</i>      | NM_021881                                                        | Forward:GCTGGGTTAATCTACACACCCTAT<br>GA                                          | 113           |
| Reverse:GACTGGCATTCAATCCACTCTA |                  |                                                                  |                                                                                 |               |
| <i>β-catenin</i>               | NM_007614        | Forward:TGGACCCCAAGCCTTAGTAAACA<br>Reverse:GTCTGTGATGAAGCCCCAGTG | 159                                                                             |               |



|                           |              |                                                                           |     |
|---------------------------|--------------|---------------------------------------------------------------------------|-----|
| <i>Lactase</i>            | NM_001081078 | Forward:GAGACCCAGAACTCAATGACACC<br>Reverse:GGTCAGAGCGGTTCACAAAGT          | 165 |
| <i>p27<sup>Kip1</sup></i> | NM_009875    | Forward:GCGGTGCCTTTAATTGGGTCT<br>Reverse:TCTTGGGCGTCTGCTCCACA             | 225 |
| <i>Col3a1</i>             | NM_009930    | Forward:GTTTCTTCTCACCTTCTTCATCCC<br>Reverse:GCAGTCTAGTGGCTCCTCATCACA<br>G | 196 |
| <i>Noxp20</i>             | NM_026667    | Forward:AGGGAGACACCGGATCTGAAATA<br>Reverse:GAATTGGCAGTGTGGATTCGTAG        | 199 |
| <i>Sox2</i>               | NM_011443    | Forward: GCGGAGTGGAACTTTTGTCC<br>Reverse: GGGAAGCGTGTACTTATCCTTCT         | 156 |

*List of conventional or LNA-primers for qPCR analyses of U6 and miRNAs.*

| RNA or miRNA       | Genbank or miRBase seq# | Primer sequence (5'→3')                                                                                                                                |
|--------------------|-------------------------|--------------------------------------------------------------------------------------------------------------------------------------------------------|
| Mouse and human U6 | NR_004394.1             | Reverse transcription: CGCTTCACGAATTTGCGTGTCAT<br>Forward: GCTTCGGCAGCACATATACTAAAAT<br>Reverse: CGCTTCACGAATTTGCGTGTCAT (LNA)                         |
| hsa-miR-16-5p      | MI0000070               | Reverse transcription:<br>GTCGTATCCAGTGC GTGTCGTGGAGTCGGCAATTGCA<br>CTGGATACGACTCGCCAA<br>Forward: GGGTAGCAGCACGTAAA<br>Reverse: TCGTGTCGTGGAGTC (LNA) |
| mmu-miR-574-5p     | MI0005518               | Reverse transcription:<br>GTCGTATCCAGTGC GTGTCGTGGAGTCGGCAATTGC<br>ACTGGATACGACTACACAC<br>Forward: GGGTGAGTGTGTGTGTG<br>Reverse: TCGTGTCGTGGAGTC (LNA) |
| hsa-miR-574-5p     | MI0003581               | Reverse transcription:<br>GTCGTATCCAGTGC GTGTCGTGGAGTCGGCAATTGC<br>ACTGGATACGACTACACAC<br>Forward: GGGTGAGTGTGTGTGTG<br>Reverse: TCGTGTCGTGGAGTC (LNA) |
| mmu-miR-200b       | MI0000243               | See Huang et al. <sup>37</sup>                                                                                                                         |
| mmu-miR-717        | MI0004704               | See Huang et al. <sup>37</sup>                                                                                                                         |
| mmu-miR-466g       | MI0005510               | Reverse transcription:<br>GTCGTATCCAGTGC GTGTCGTGGAGTCGGCAATTGC<br>ACTGGATACGACTGTGTGT<br>Forward: GGGATACAGACACATGC<br>Reverse: TCGTGTCGTGGAGTC (LNA) |
| mmu-miR-17         | MI0000687               | Reverse transcription:<br>GTCGTATCCAGTGC GTGTCGTGGAGTCGGCAATTGC<br>ACTGGATACGACTCTACCT<br>Forward: GGGCAAAGTGCTTACAG<br>Reverse: TCGTGTCGTGGAGTC (LNA) |
| mmu-miR-20a        | MI0000568               | Reverse transcription:<br>GTCGTATCCAGTGC GTGTCGTGGAGTCGGCAATTGC<br>ACTGGATACGACTCTACCT                                                                 |

---

Forward: GGGGTAAAGTGCTTATAG

Reverse: TGC GTGTCGTGGAGTC (LNA)

---

### 3. SUPPLEMENTAL REFERENCES

- 1 Bockbrader K, Feng Y. Essential function, sophisticated regulation and pathological impact of the selective RNA-binding protein QKI in CNS myelin development. *Future Neurol* 2008;**3**(6):655-68.
- 2 Klempan TA, Ernst C, Deleva V *et al.* Characterization of QKI gene expression, genetics, and epigenetics in suicide victims with major depressive disorder. *Biol Psychiatry* 2009;**66**(9):824-31.
- 3 Li ZZ, Kondo T, Murata T *et al.* Expression of Hqk encoding a KH RNA binding protein is altered in human glioma. *Jpn J Cancer Res* 2002;**93**(2):167-77.
- 4 Yang G, Fu H, Zhang J *et al.* RNA-binding protein quaking, a critical regulator of colon epithelial differentiation and a suppressor of colon cancer. *Gastroenterology* 2010;**138**(1):231-40.
- 5 Meyers-Needham M, Ponnusamy S, Gencer S *et al.* Concerted functions of HDAC1 and microRNA-574-5p repress alternatively spliced ceramide synthase 1 expression in human cancer cells. *EMBO Mol Med* 2011.
- 6 Novikov L, Park JW, Chen H *et al.* QKI-mediated alternative splicing of the histone variant MacroH2A1 regulates cancer cell proliferation. *Mol Cell Biol* 2011;**31**(20):4244-55.
- 7 Takahashi K, Tanabe K, Ohnuki M *et al.* Induction of pluripotent stem cells from adult human fibroblasts by defined factors. *Cell* 2007;**131**(5):861-72.
- 8 Takahashi K, Yamanaka S. Induction of pluripotent stem cells from mouse embryonic and adult fibroblast cultures by defined factors. *Cell* 2006;**126**(4):663-76.
- 9 Yu J, Vodyanik MA, Smuga-Otto K *et al.* Induced pluripotent stem cell lines derived from human somatic cells. *Science* 2007;**318**(5858):1917-20.
- 10 Ferri AL, Cavallaro M, Braida D *et al.* Sox2 deficiency causes neurodegeneration and impaired neurogenesis in the adult mouse brain. *Development* 2004;**131**(15):3805-19.
- 11 Archer TC, Jin J, Casey ES. Interaction of Sox1, Sox2, Sox3 and Oct4 during primary neurogenesis. *Dev Biol* 2011;**350**(2):429-40.
- 12 Episkopou V. SOX2 functions in adult neural stem cells. *Trends Neurosci* 2005;**28**(5):219-21.
- 13 Bylund M, Andersson E, Novitsch BG *et al.* Vertebrate neurogenesis is counteracted by Sox1-3 activity. *Nat Neurosci* 2003;**6**(11):1162-8.
- 14 Saigusa S, Tanaka K, Toiyama Y *et al.* Correlation of CD133, OCT4, and SOX2 in rectal cancer and their association with distant recurrence after chemoradiotherapy. *Ann Surg Oncol* 2009;**16**(12):3488-98.
- 15 Fang X, Yu W, Li L *et al.* ChIP-seq and functional analysis of the SOX2 gene in colorectal cancers. *OMICS* 2010;**14**(4):369-84.
- 16 Wang Q, He W, Lu C *et al.* Oct3/4 and Sox2 are significantly associated with an unfavorable clinical outcome in human esophageal squamous cell carcinoma. *Anticancer Res* 2009;**29**(4):1233-41.
- 17 Sanada Y, Yoshida K, Ohara M *et al.* Histopathologic evaluation of stepwise progression of pancreatic carcinoma with immunohistochemical analysis of gastric epithelial transcription factor SOX2: comparison of expression patterns between invasive components and cancerous or nonneoplastic intraductal components. *Pancreas* 2006;**32**(2):164-70.

- 18 Fang X, Yoon JG, Li L *et al.* The SOX2 response program in glioblastoma multiforme: an integrated ChIP-seq, expression microarray, and microRNA analysis. *BMC Genomics* 2011;**12**:11.
- 19 Sholl LM, Barletta JA, Yeap BY *et al.* Sox2 protein expression is an independent poor prognostic indicator in stage I lung adenocarcinoma. *Am J Surg Pathol* 2010;**34**(8):1193-8.
- 20 Foss KM, Sima C, Ugolini D *et al.* miR-1254 and miR-574-5p: Serum-Based microRNA Biomarkers for Early-Stage Non-small Cell Lung Cancer. *J Thorac Oncol* 2011;**6**(3):482-8.
- 21 Ranade AR, Cherba D, Sridhar S *et al.* MicroRNA 92a-2\*: a biomarker predictive for chemoresistance and prognostic for survival in patients with small cell lung cancer. *J Thorac Oncol* 2010;**5**(8):1273-8.
- 22 Liu H, Liu R, Su Y *et al.* [A pilot study of differentially expressed microRNAs between esophageal squamous cell carcinoma and adjacent tissues in Huai'an population]. *Carcinogenesis, Teratogenesis & Mutagenesis (Chinese)* 2010;**22**(6):418-22.
- 23 Mao ZG, He DS, Zhou J *et al.* Differential expression of microRNAs in GH-secreting pituitary adenomas. *Diagn Pathol* 2010;**5**:79.
- 24 Zhao S, Wang Y, Liang Y *et al.* MicroRNA-126 regulates DNA methylation in CD4+ T cells and contributes to systemic lupus erythematosus by targeting DNA methyltransferase 1. *Arthritis Rheum* 2011;**63**(5):1376-86.
- 25 Ali S, Almhanna K, Chen W *et al.* Differentially expressed miRNAs in the plasma may provide a molecular signature for aggressive pancreatic cancer. *Am J Transl Res* 2010;**3**(1):28-47.
- 26 Malumbres R, Sarosiek KA, Cubedo E *et al.* Differentiation stage-specific expression of microRNAs in B lymphocytes and diffuse large B-cell lymphomas. *Blood* 2009;**113**(16):3754-64.
- 27 Bostjancic E, Zidar N, Glavac D. MicroRNA microarray expression profiling in human myocardial infarction. *Dis Markers* 2009;**27**(6):255-68.
- 28 Wang WX, Huang Q, Hu Y *et al.* Patterns of microRNA expression in normal and early Alzheimer's disease human temporal cortex: white matter versus gray matter. *Acta Neuropathol* 2011;**121**(2):193-205.
- 29 Moreau MP. Altered microRNA regulatory networks in individuals with schizophrenia. Rutgers, The State University of New Jersey and The Graduate School of Biomedical Sciences University of Medicine and Dentistry of New Jersey, 2009.
- 30 Xiao J, Liang D, Zhang Y *et al.* MicroRNA expression signature in atrial fibrillation with mitral stenosis. *Physiol Genomics* 2011;**43**(11):655-64.
- 31 Eitan R, Kushnir M, Lithwick-Yanai G *et al.* Tumor microRNA expression patterns associated with resistance to platinum based chemotherapy and survival in ovarian cancer patients. *Gynecol Oncol* 2009;**114**(2):253-9.
- 32 Hou J, Wang P, Lin L *et al.* MicroRNA-146a feedback inhibits RIG-I-dependent Type I IFN production in macrophages by targeting TRAF6, IRAK1, and IRAK2. *J Immunol* 2009;**183**(3):2150-8.
- 33 Garbacki N, Di VE, Huynh-Thu VA *et al.* MicroRNAs Profiling in Murine Models of Acute and Chronic Asthma: A Relationship with mRNAs Targets. *PLoS One* 2011;**6**(1):e16509.
- 34 Mallick B, Ghosh Z, Chakrabarti J. MicroRNome analysis unravels the molecular basis of SARS infection in bronchoalveolar stem cells. *PLoS One* 2009;**4**(11):e7837.
- 35 Wang K, Zhang S, Marzolf B *et al.* Circulating microRNAs, potential biomarkers for drug-induced liver

- injury. *Proc Natl Acad Sci U S A* 2009;**106**(11):4402-7.
- 36 Hu SJ, Ren G, Liu JL *et al.* MicroRNA expression and regulation in mouse uterus during embryo implantation. *J Biol Chem* 2008;**283**(34):23473-84.
- 37 Huang W, Liu H, Wang T *et al.* Tonicity-responsive microRNAs contribute to the maximal induction of osmoregulatory transcription factor OREBP in response to high-NaCl hypertonicity. *Nucleic Acids Res* 2011;**39**(2):475-85.
- 38 Lan KL, Yen SH, Liu RS *et al.* Mutant Bik gene transferred by cationic liposome inhibits peritoneal disseminated murine colon cancer. *Clin Exp Metastasis* 2007;**24**(6):461-70.
